# Supplementary material
Source: PubMed Central journal article supplement (PMC2668024)
Supplement: mmc1.pdf [file mmc1.pdf]

## Supplemental Data

### A Genome-wide Survey of the Prevalence and Evolutionary

### Forces Acting on Human Nonsense SNPs

Bryndis Yngvadottir, Yali Xue, Steve Searle, Sarah Hunt, Marcos Delgado, Jonathan Morrison, Pamela Whittaker, Panos Deloukas and Chris Tyler-Smith

#### Figure S1. Population locations of genotyped samples

A) Geographical locations and names of the 52 HGDP-CEPH populations genotyped. The coordinates for the HGDP-CEPH populations were obtained from the CEPH website at <http://www.cephb.fr/en/hgdp/diversity.php/table.php>. The diameter of the orange circles is proportional to sample sizes. The HapMap populations are not shown.

B) Geographical locations of the genotyped populations as they appear in allele frequency pie charts in Figure 4A which were used in the  $F_{ST}$  calculations. Some related populations were clustered together to reduce population size bias, resulting in 37 populations displayed on the map. The diameter of the green circles is proportional to sample sizes. The HapMap populations (The International HapMap Consortium 2003)- CEPH Utah residents with ancestry from northern and western Europe (CEU), Yoruba in Ibadan, Nigeria (YRI), Han Chinese in Beijing (CHB) and Japanese in Tokyo (JPT)) are inserted at the bottom of the map as they do not have geographical coordinates.

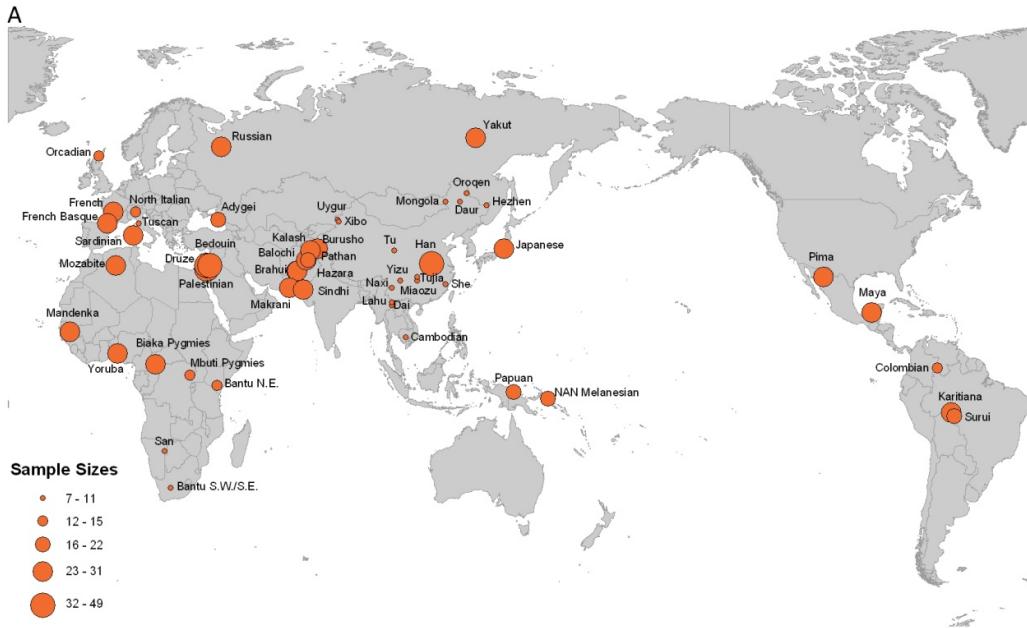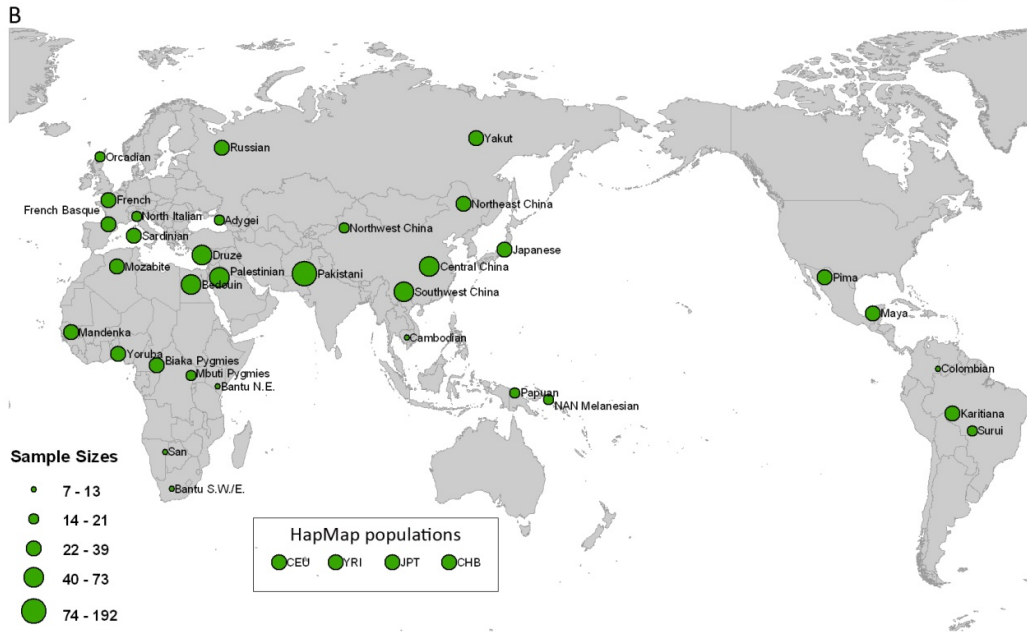

**Figure S2. Comparison of the DAF spectrum of nonsense- and synonymous-SNPs in the sample of worldwide populations**

The DAF was calculated for each SNP and sorted into ten bins. The DAF of nonsense-SNPs (red) was significantly lower than the DAF of the synonymous-SNPs (blue) (Kolmogorov-Smirnov,  $P < 0.001$ ). The DAF spectrum was also viewed by separating the populations into five categories (according to  $K=5$  in Rosenberg et al. 2002) (data not shown) and the distributions were found to be similar to the distribution observed in this figure.

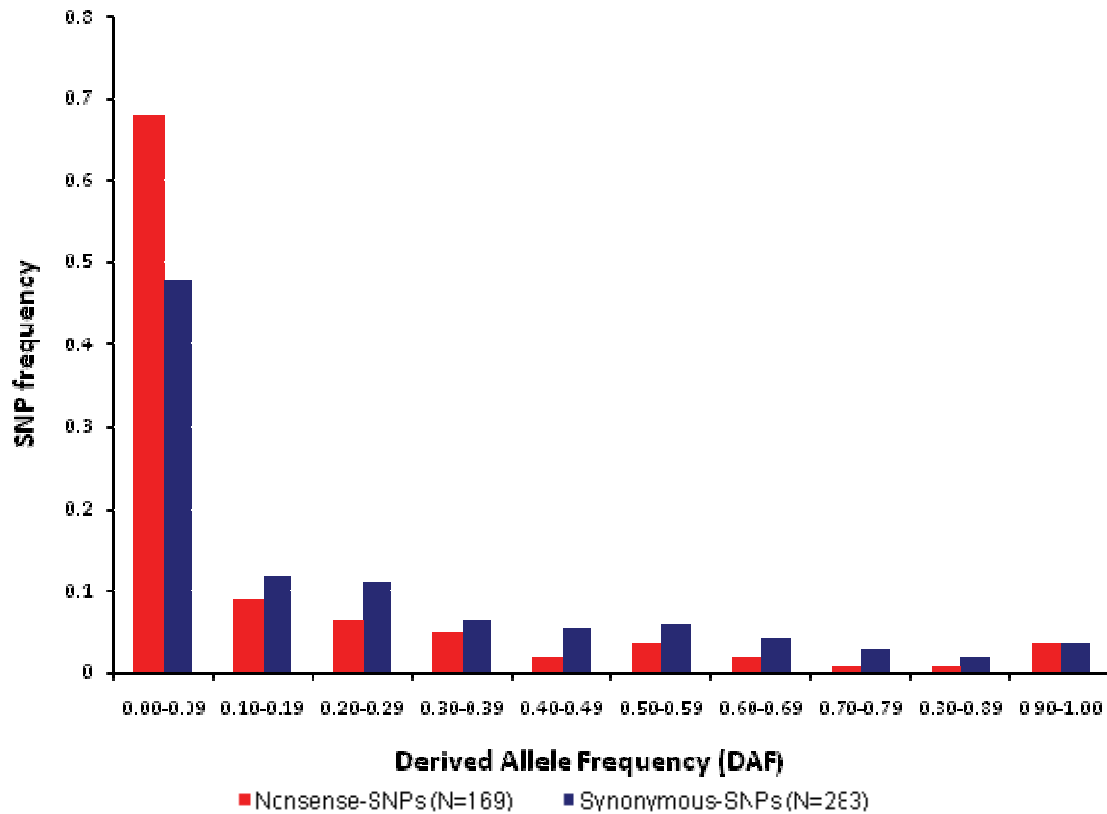

**Figure S3 Comparison of  $F_{ST}$  values between nonsense- and synonymous-SNPs for 37 populations.**  $F_{ST}$  values were calculated by conventional F-statistic methods with the HIERFSTAT(Goudet 2005) package for R using the *varcomp* function to calculate the  $F_{ST}$  (theta) from Weir and Cockerham(Weir and Cockerham 1984). This F-statistic uses the allele frequencies to quantify the proportion of the total variance among the human populations. The  $F_{ST}$  values were sorted into six bins and most of the SNPs (both nonsense and synonymous) fell in the lowest bin (0.00-0.19). On average, nonsense-SNPs (red) had significantly lower  $F_{ST}$  values than synonymous-SNPs (blue) (Kolmogorov-Smirnov,  $P < 0.001$ ) with a mean of  $\sim 0.06$  and  $\sim 0.10$ , respectively. The highest outlier ( $F_{ST}=0.54$ ) was found in a nonsense-SNP (rs1343879) within the *MAGEE2* gene.

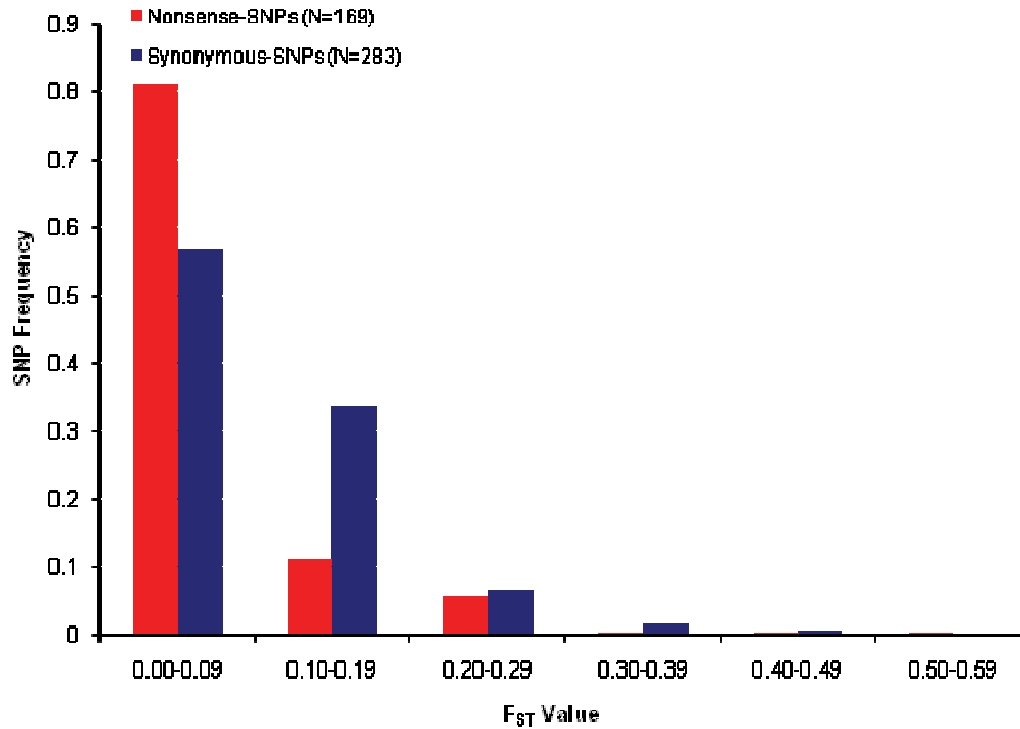

**Figure S4  $F_{ST}$  versus heterozygosity.**

Synonymous-SNPs are plotted in blue and nonsense-SNPs in red and no linear correlation is observed. Some nonsense-SNP gene outliers are labelled.

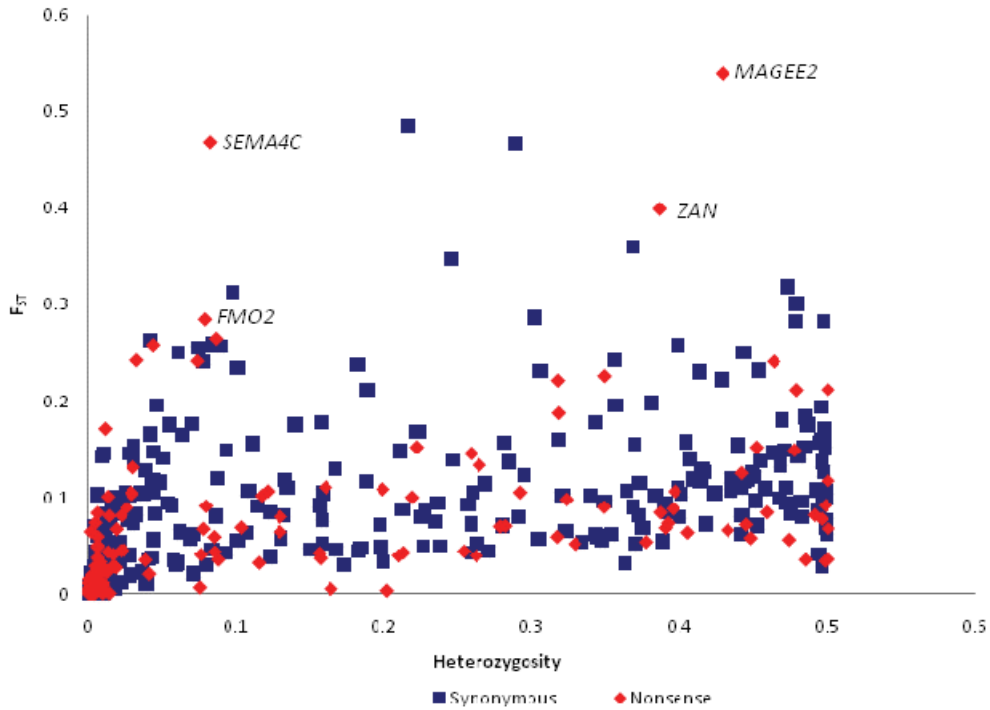

**Figure S5 Relative extended haplotype homozygosity (REHH) versus frequency distribution**

REHH is plotted against the frequency of each SNP in each HapMap sample A) CEU, B) JPT+CHB and C) YRI and some outliers are labelled. The grey dots represent the controls (30 ENCODE random regions) while the red dots are the stop alleles. Green and blue lines represent the 95<sup>th</sup> and 99<sup>th</sup> percentiles, respectively.

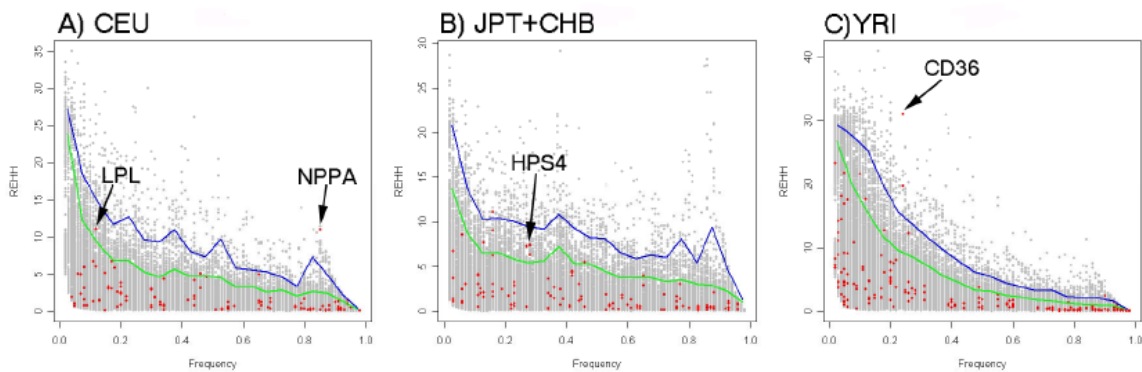

**Table S5. GO terms strongly enriched (P<0.05) in the set of nonsense-SNP genes**

The table displays the enriched terms associated with the list of nonsense-SNP genes, the number of genes involved in the term, the percentage (involved genes/total genes) and the P-value (modified Fisher-Exact, EASE score).

| Term                                                             | Count | %      | P-value |
|------------------------------------------------------------------|-------|--------|---------|
| <b>Biological Process</b>                                        |       |        |         |
| GO:0007608~sensory perception of smell                           | 12    | 8.11%  | 0.0002  |
| GO:0007606~sensory perception of chemical stimulus               | 12    | 8.11%  | 0.0005  |
| GO:0032501~multicellular organismal process                      | 40    | 27.03% | 0.0014  |
| GO:0003008~system process                                        | 20    | 13.51% | 0.0032  |
| GO:0050877~neurological system process                           | 16    | 10.81% | 0.0114  |
| GO:0019320~hexose catabolic process                              | 4     | 2.70%  | 0.0178  |
| GO:0046365~monosaccharide catabolic process                      | 4     | 2.70%  | 0.0184  |
| GO:0046164~alcohol catabolic process                             | 4     | 2.70%  | 0.0196  |
| GO:0007166~cell surface receptor linked signal transduction      | 21    | 14.19% | 0.0202  |
| GO:0007186~G-protein coupled receptor protein signalling pathway | 15    | 10.14% | 0.0203  |
| GO:0007154~cell communication                                    | 38    | 25.68% | 0.0228  |
| GO:0009056~catabolic process                                     | 11    | 7.43%  | 0.0263  |
| GO:0007600~sensory perception                                    | 12    | 8.11%  | 0.0265  |
| GO:0022610~biological adhesion                                   | 11    | 7.43%  | 0.0327  |
| GO:0007155~cell adhesion                                         | 11    | 7.43%  | 0.0327  |
| GO:0044275~cellular carbohydrate catabolic process               | 4     | 2.70%  | 0.0368  |
| GO:0006118~electron transport                                    | 8     | 5.41%  | 0.0406  |
| GO:0016052~carbohydrate catabolic process                        | 4     | 2.70%  | 0.0430  |
| GO:0016337~cell-cell adhesion                                    | 6     | 4.05%  | 0.0434  |
| GO:0007165~signal transduction                                   | 34    | 22.97% | 0.0436  |
| GO:0050878~regulation of body fluid levels                       | 4     | 2.70%  | 0.0486  |
| <b>Molecular Function</b>                                        |       |        |         |
| GO:0004984~olfactory receptor activity                           | 12    | 8.11%  | 0.0003  |
| GO:0030246~carbohydrate binding                                  | 10    | 6.76%  | 0.0005  |
| GO:0004872~receptor activity                                     | 28    | 18.92% | 0.0011  |
| GO:0004499~flavin-containing monooxygenase activity              | 3     | 2.03%  | 0.0013  |
| GO:0004888~transmembrane receptor activity                       | 20    | 13.51% | 0.0033  |
| GO:0005529~sugar binding                                         | 7     | 4.73%  | 0.0037  |
| GO:0060089~molecular transducer activity                         | 30    | 20.27% | 0.0045  |
| GO:0004871~signal transducer activity                            | 30    | 20.27% | 0.0045  |
| GO:0001584~rhodopsin-like receptor activity                      | 13    | 8.78%  | 0.0126  |
| GO:0050661~NADP binding                                          | 3     | 2.03%  | 0.0150  |
| GO:0004930~G-protein coupled receptor activity                   | 14    | 9.46%  | 0.0151  |
| GO:0016709~oxidoreductase activity                               | 3     | 2.03%  | 0.0196  |
| GO:0046983~protein dimerization activity                         | 7     | 4.73%  | 0.0271  |
| GO:0042803~protein homodimerization activity                     | 5     | 3.38%  | 0.0287  |

### Supplemental References

- Goudet J. 2005. Hierfstat, a package for R to compute and test hierarchical F-statistics. *Molecular Ecology Notes* 5:184-186.
- Nei M. 1987. *Molecular evolutionary genetics*. New York: Columbia University Press.
- Rosenberg NA, Pritchard JK, Weber JL, Cann HM, Kidd KK, Zhivotovsky LA, and Feldman MW. 2002. Genetic structure of human populations. *Science* 298(5602):2381-2385.

- The International HapMap Consortium. 2003. The International HapMap Project. *Nature* 426(6968):789-796.
- Weir BS, and Cockerham CC. 1984. Estimating F-statistics for the analysis of population structure. *Evolution* 38:1358-1370.
